# Supplementary material for: How many surface atoms in Co3O4 take part in oxygen evolution? Isotope labeling together with differential electrochemical mass spectrometry
Source: Royal Society of Chemistry journal article supplement (doi:10.1039/c7cp03914j), 2017-01-01
Supplement: c7cp03914j1.pdf [file c7cp03914j1.pdf]

## Supplementary Information

### How many surface atoms in $\text{Co}_3\text{O}_4$ take part in oxygen evolution? Isotope labeling together with differential electrochemical mass spectrometry

Hatem M.A. Amin<sup>a,b</sup>, Helmut Baltruschat<sup>a,\*</sup>

#### Calculations for the $\text{Co}_3\text{O}_4$ (50 nm) catalyst with $200 \mu\text{g cm}^{-2}$ loading in 0.1M LiOH solution (upper potential limit is 1.8V):

Analysis of the real surface area of the catalyst using the ball model, DL-capacitance assumption model and redox peak model was performed and compared to BET data:

Based on the model used in eq. 7, the number of moles of oxygen atoms at surface per true  $\text{cm}^2$  is  $S = 1.85 \text{ nmol/cm}^2_{\text{geo}}$ .

▪ *Isotope exchange model:*

For the 50 nm particles, the total amount of exchanged lattice oxygen is  $n_{ex,t} = 7.3 \text{ nmol/cm}^2$ . This gives a true surface area per geometric area of  $A_{tr}/A_{geo} = 7.3 \text{ (nmol/cm}^2_{\text{geo}})/1.85 \text{ (nmol/cm}^2_{\text{tr}}) = 3.9 \text{ cm}^2_{\text{tr}}/\text{cm}^2$ .

Here, the total amount of oxygen atoms in the loading is  $n_t(O^{2-}) = 3320 \text{ nmol/cm}^2$ . Therefore, the amount of exchanged oxygen to the total loading is  $r_{ex} = 7.3 \text{ (nmol/cm}^2)/3320 \text{ (nmol/cm}^2) = 0.22\%$ .

▪ *ball model:*

For radius  $r = 25 \text{ nm}$ , the mass of this loading is  $m(\text{Co}_3\text{O}_4) = 56.6 \mu\text{g}$  and with the help of eq. 8, this gives a true surface area of  $A_{tr} = 11 \text{ cm}^2$ . This means the  $A_{tr}/A_{geo} = 11 \text{ cm}^2_{\text{tr}}/0.283 \text{ cm}^2_{\text{geo}} = 39 \text{ cm}^2_{\text{tr}}/\text{cm}^2_{\text{geo}}$ , and the number of moles of surface atoms according to eq. 9 is  $n = 39 \text{ (cm}^2_{\text{tr}}/\text{cm}^2_{\text{geo}}) \times 1.85 \text{ (nmol/cm}^2_{\text{tr}}) = 72 \text{ nmol/cm}^2_{\text{geo}}$ .

According to eq. 6, the fraction of oxygen exchanged from surface atoms  $y_{ex} = 7.3/72 = 0.1$  (10%).

▪ *DL- capacitance method:*

For the potential range between 0.76 V and 1.39 V, using eq. 10 we obtain  $A_{tr}/A_{geo} = 140 \text{ cm}^2_{\text{tr}}/\text{cm}^2_{\text{geo}}$ . Thus, the true surface area is  $A_{tr} = 140 \times 0.28 \text{ cm}^2/56.6 \mu\text{g} = 70 \text{ m}^2/\text{g}$ . The number of moles of surface atoms according to eq. 9 is  $n = 140 \text{ (cm}^2_{\text{tr}}/\text{cm}^2_{\text{geo}}) \times 1.85 \text{ nmol/cm}^2_{\text{tr}} = 255 \text{ nmol/cm}^2_{\text{geo}}$ .

▪ *Redox peak model:*

The charge under the redox peak corresponding to the transition  $\text{Co}^{3+}/\text{Co}^{4+/3+}$  is  $5.7 \text{ mC/cm}^2$ . Consequently, the number of moles of surface atoms is  $n_{surf} = 5.7/(1.F) \text{ nmol/cm}^2 = 59 \text{ nmol/cm}^2$ , this gives that the amount of exchanged oxygen to the surface atoms is  $y_{ex} = 12\%$ . Using eq. 9, we obtain  $A_{tr}/A_{geo} = 59 \text{ (nmol/cm}^2_{\text{geo}})/1.85 \text{ (nmol/cm}^2_{\text{tr}}) = 32 \text{ cm}^2_{\text{tr}}/\text{cm}^2_{\text{geo}}$ .

## BET and XRD data of $\text{Co}_3\text{O}_4$

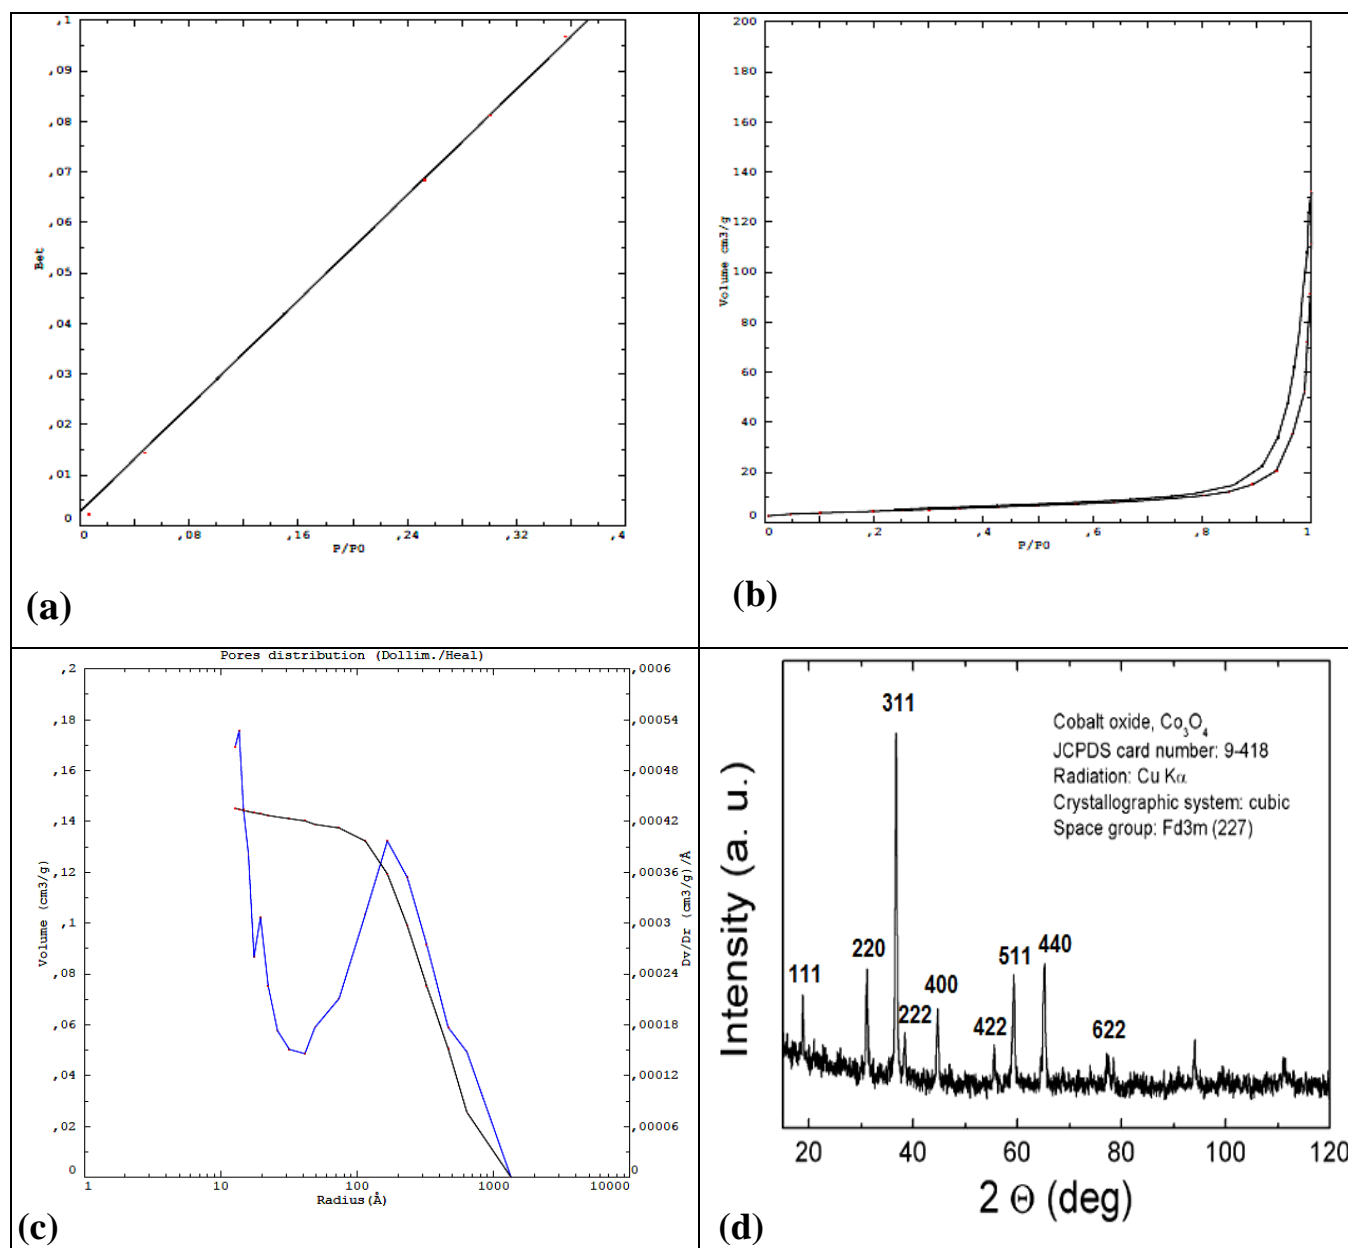

Fig. S1. (a) BET plot of  $\text{Co}_3\text{O}_4$  (50 nm) catalyst. (b) Adsorption/desorption isotherms on the catalyst. (c) Particle size distribution of the corresponding catalyst. (d) XRD patterns of  $\text{Co}_3\text{O}_4$  (50 nm).

BET plot and adsorption/desorption isotherms for  $\text{Co}_3\text{O}_4$  catalyst are depicted in Fig. S1a and b. The specific surface area obtained for 50 nm  $\text{Co}_3\text{O}_4$  catalyst is  $16.5 \text{ m}^2 \text{ g}^{-1}$ . The particle size distribution of  $\text{Co}_3\text{O}_4$  was analyzed and the average particle size (assuming that the particles are spherical and non-porous) was determined from BET data. An average particle diameter of 40 nm was found as shown in Fig. S1c, which is consistent with the value given from the manufacturer data sheet. XRD patterns (supplied from the manufacturer) of  $\text{Co}_3\text{O}_4$  (50 nm) catalyst are shown in Fig. S1d. The signals are then analyzed and assigned to the different phases of cobalt oxide. The graph exhibits intense and sharp diffraction peaks which are

characteristic of the  $\text{Co}_3\text{O}_4$  cubic spinel crystalline structure. The signals of  $\text{Co}_3\text{O}_4$  agreed perfectly with XRD standard data (JCPDS card number: 9-418). The oxide is highly pure since no peaks of any impurity phase could be observed from this pattern.
